Published by

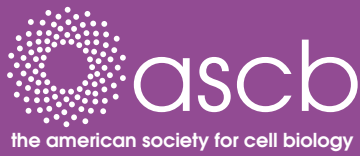

Editorial Partner

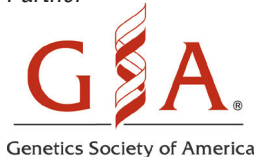

Volume 13, Spring 2014

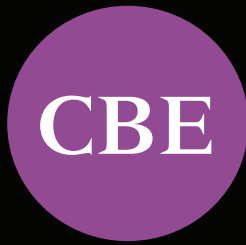

# Life Sciences Education

[www.lifescied.org](http://www.lifescied.org)

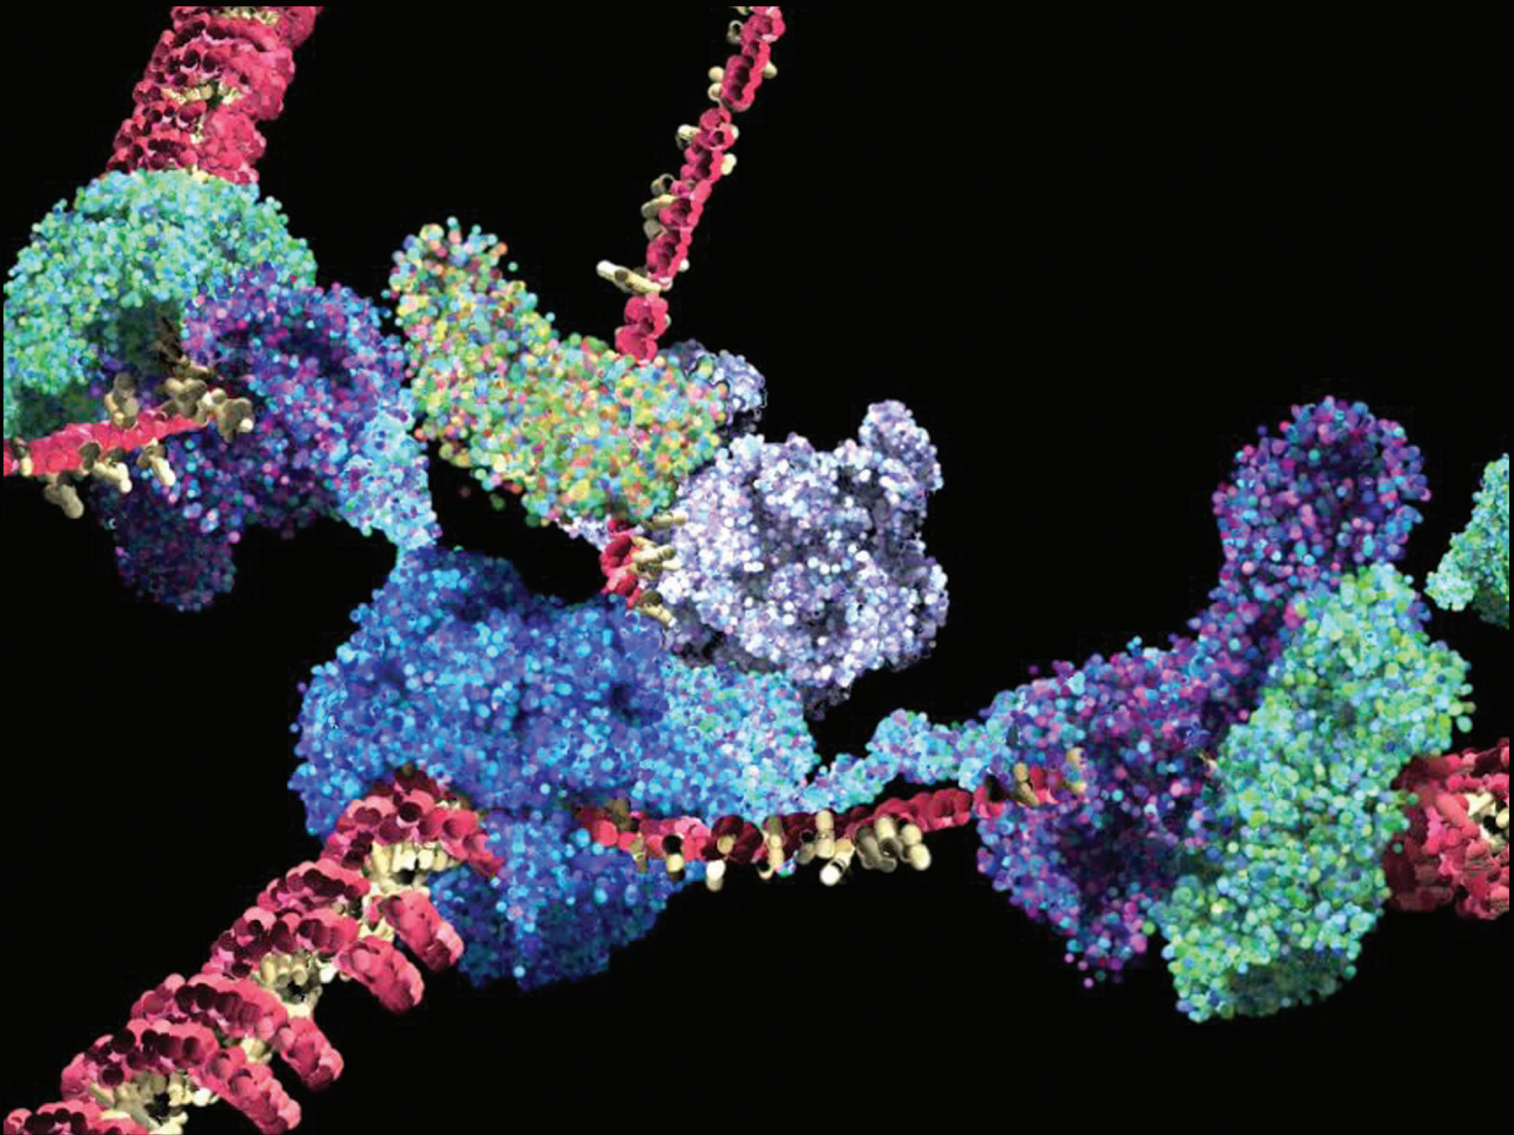

## Undergraduate Research Experiences: Approaches and Assessments
